# Supplementary material
Source: Royal Society of Chemistry journal article supplement (doi:10.1039/d6an00092d)
Supplement: d6an00092d1.pdf [file d6an00092d1.pdf]

## Supplementary Information

### A Nickel-Based Bipolar Electrochemiluminescence Platform for Glucose Detection

Xianchuan Dong<sup>a</sup>, Yaoxuan Wang<sup>a</sup>, Jing Sui<sup>a</sup>, Siqu Huang<sup>a</sup>, Feifei Zhang<sup>a,\*</sup>,  
Zonghua Wang<sup>a, b</sup>

<sup>a</sup> College of Chemistry and Chemical Engineering, Qingdao Application Technology Innovation Center of Photoelectric Biosensing for Clinical Diagnosis and Treatment, Shandong Sino-Japanese Center for Collaborative Research of Carbon Nanomaterials, Qingdao University, Qingdao 266071, China. E-mail: zhangfeifei@qdu.edu.cn

<sup>b</sup> Characteristic Laboratory of Advanced Metal Functional Materials and Processing in Universities of Shandong, School of Mechanical and Electronic Engineering, Qingdao Binhai University, Qingdao 266555, China.

Corresponding author: zhangfeifei@qdu.edu.cn

## **Table of contents**

1. ImageJ software data treating
2. Fig. S1 The physical diagram of the detection device
3. Fig. S2 Optimization diagram of luminol concentration
4. Fig. S3 Optimization chart for N<sub>2</sub> supply time
5. Fig. S4 Optimization of glucose oxidase concentration
6. Fig. S5 Sensor detection performance under battery-supplied working potential

### 1. ImageJ software data treating

The images and videos were processed using Image J software (AVI encoding) and ultimately converted to WMV format. The average intensity of the ECL signal generation area was calculated using Image J. As can be seen from the figure below, the ECL luminescent area of the sensor is circular, which is attributed to the circular shape of the nickel bipolar electrode (Ni-BPE), with a specific area of 50.3 mm<sup>2</sup>. In ImageJ, a region with a relative area of 2514 was selected, and the corresponding ECL signal intensity was determined to be 33.601. For all data processing procedures, the selected region was fixed at 2514 to ensure a consistent variable condition.

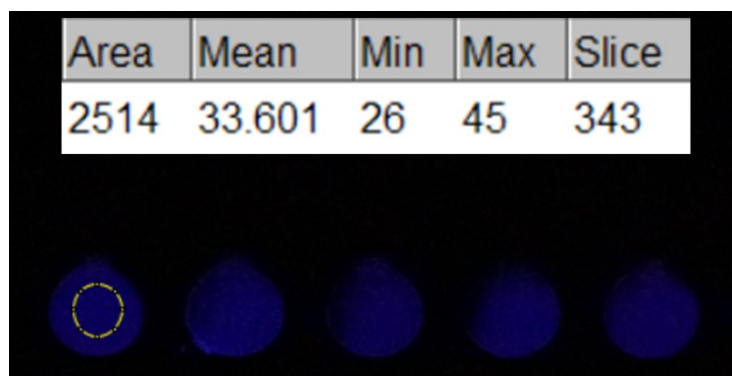

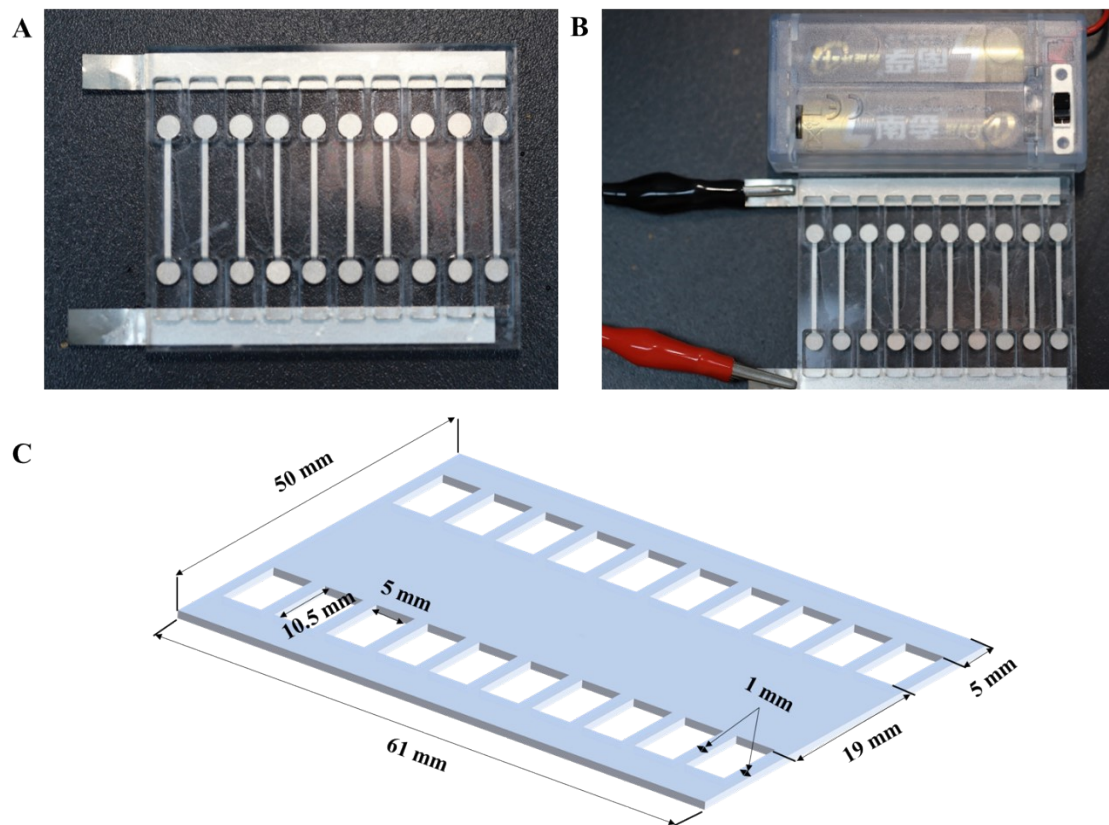

Fig. S1. The physical diagram of the detection device. (A) the physical device. (B) Device working diagram. (C) specific size.

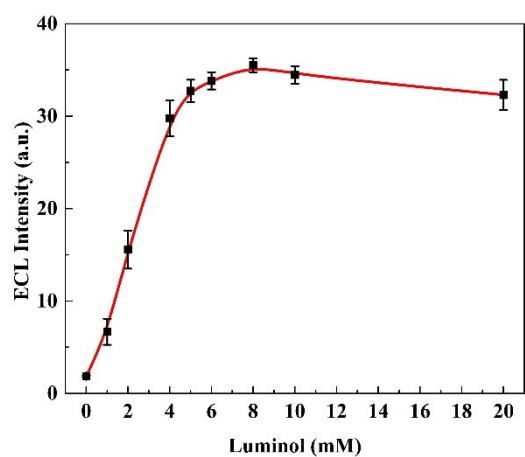

Fig. S2. Optimization diagram of luminol concentration. Working potential 3.5 V,  $\text{H}_2\text{O}_2$  concentration 500  $\mu\text{M}$ .

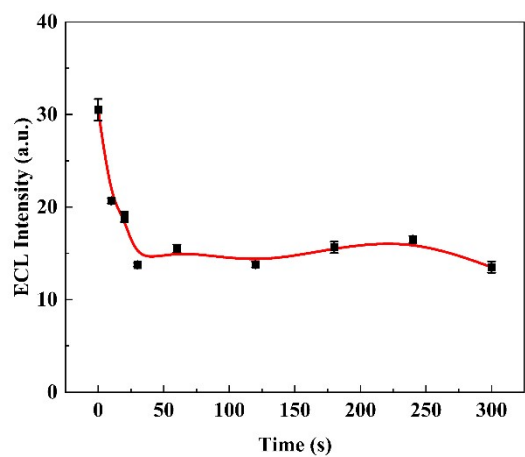

Fig. S3. Optimization chart for  $\text{N}_2$  supply time. Working potential 3.5 V,  $\text{H}_2\text{O}_2$  concentration 200  $\mu\text{M}$ , luminol concentration 5  $\mu\text{M}$ .

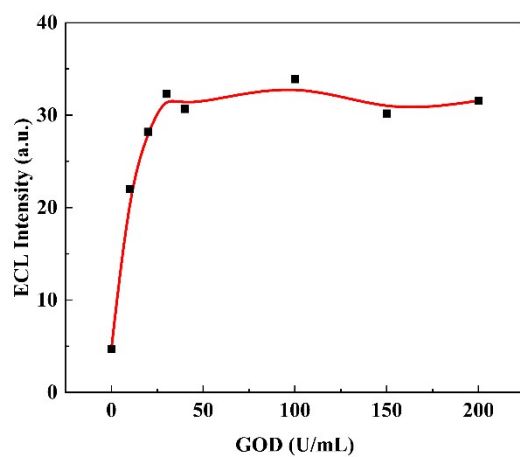

Fig. S4. Optimization graph of glucose oxidase concentration.

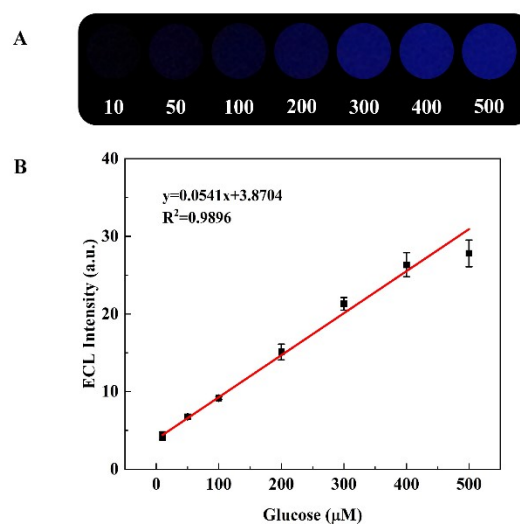

Fig. S5. Sensor detection performance under battery-supplied working potential. (A) Visual ECL images corresponding to different glucose concentrations. (B) Corresponding calibration plot of the relative ECL intensity vs. glucose concentration.
